# Supplementary material for: Combined Classifier‐Demodulator Scheme Based on LSTM Architecture
Source: Hindawi journal article supplement (doi:10.1155/2022/5584481), 2022-01-01
Supplement: f1 [file 5584481.f1.docx]

**Supplementary Material Related to the Paper**


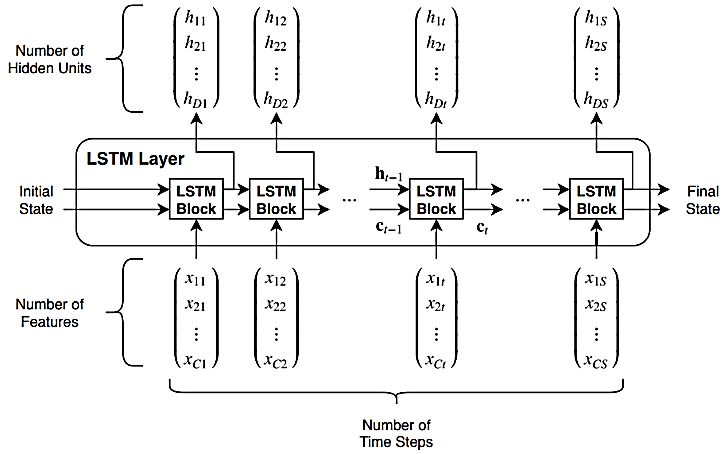


**Additional Figure 1**  LSTM Layer


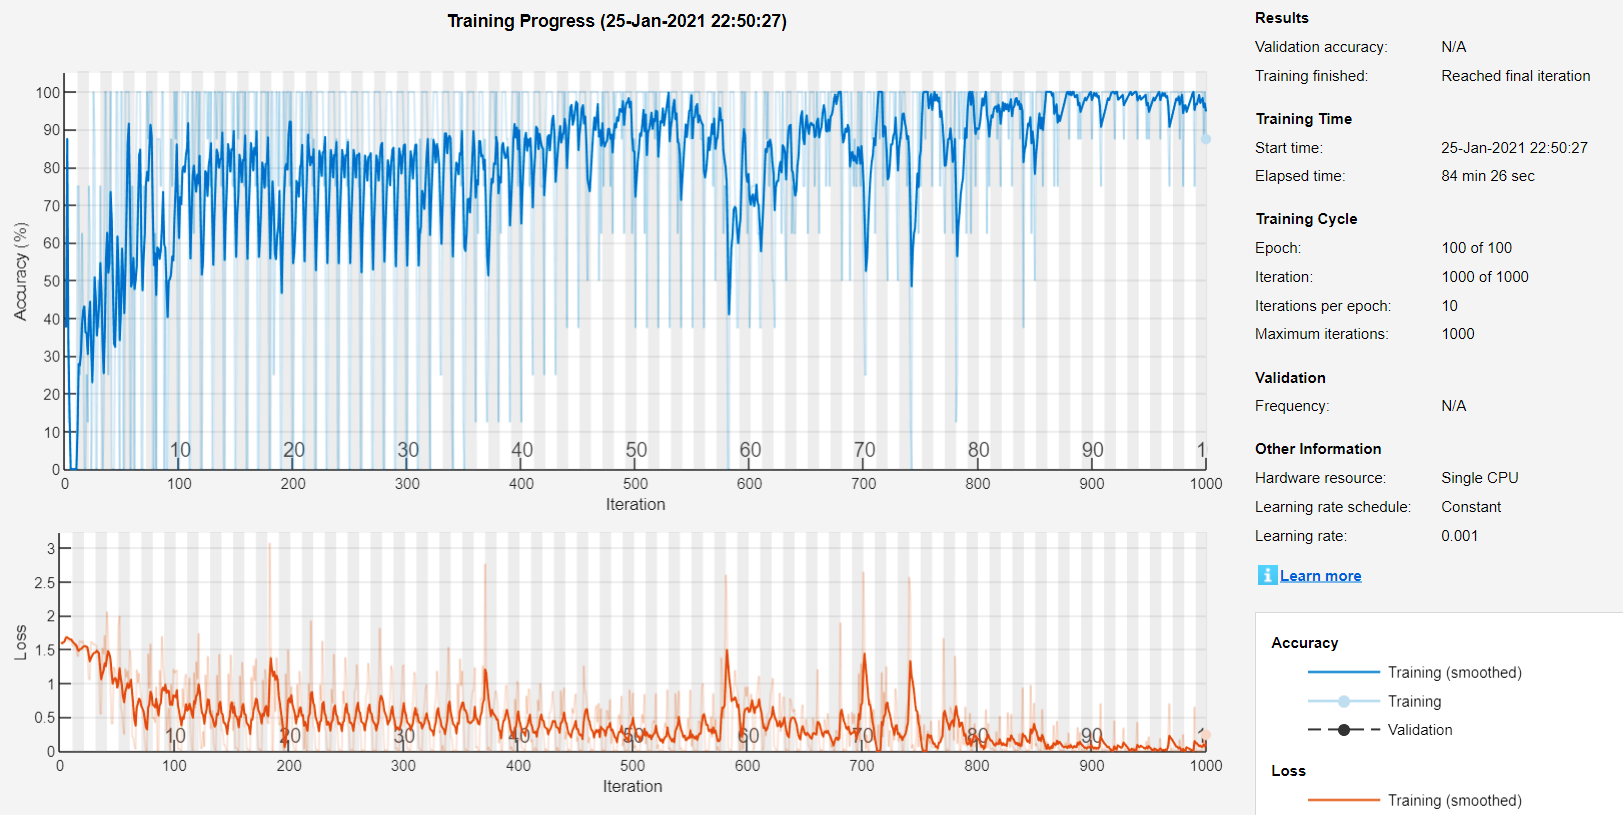


**Additional Figure 2**  Sample training progress plot for modulation classifier

e.g., 16QAM

***Additional Fig. 3*** *Input Data Generation*

Note: The complex numerical data that was transmitted through an AWGN channel was then split into its real and imaginary components (i.e., the in-phase and quadrature components) as input to the model. A summary of data matrix transformations is given in above Figure 3.:

**Additional Figure 4:** Statistical Analysis of Combined System Performance

**Additional Figure 5** PSK and QAM modulated signals

**Additional Figure 6** BER vs. SNR - 64QAM: Positive vs All SNR Ranges

**Additional Figure 7**  BER vs. SNR - 256QAM: Positive vs All SNR Ranges

Additional Fig. 8: 16QAM demodulator performance for various LSTM hidden unit nos. and layer nos.


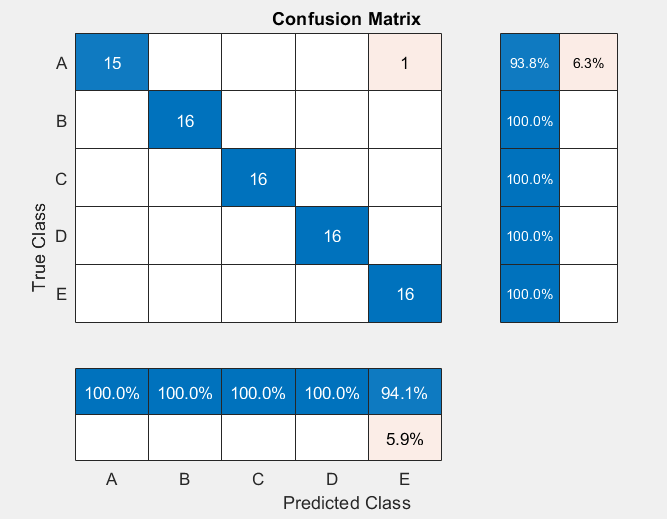


Fig. 9: Classifier confusion matrix for SNR = -8 dB


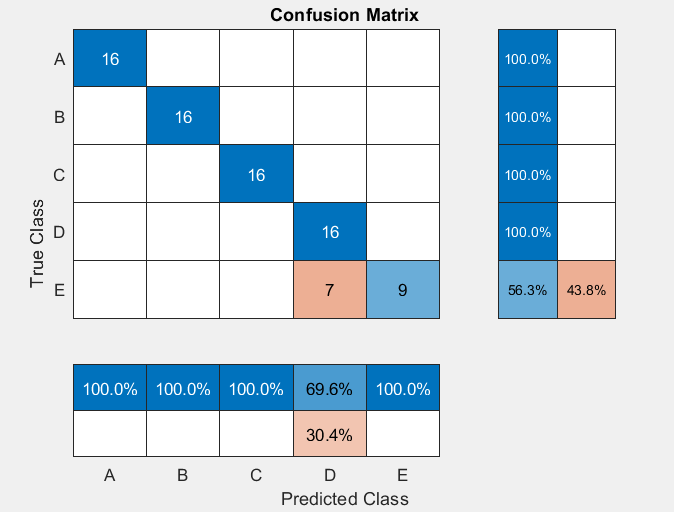


Fig. 10: Classifier confusion matrix for SNR = -2 dB


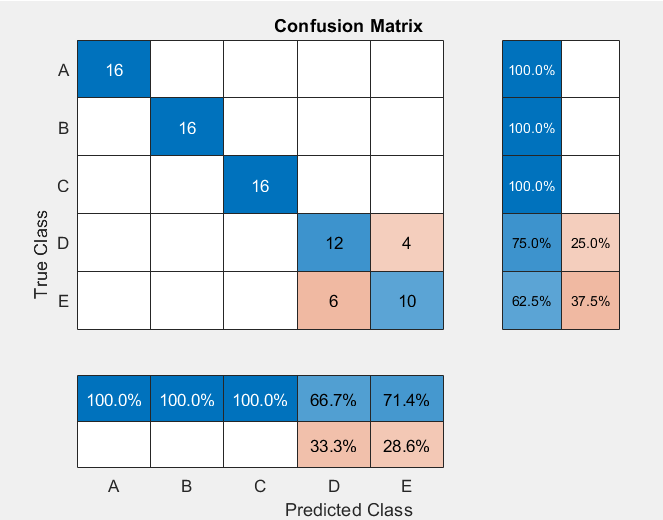


Fig. 11: Classifier confusion matrix for SNR = 2 dB

TABLE I

Effective Capacities of Demodulator Models

| Demodulator | Effective Capacity (bits s-1) |
| --- | --- |
| BPSK | 1240 |
| QPSK | 3985 |
| 16QAM | 3844 |
| 64QAM | 3616 |
| 256QAM | 4650 |

**Additional Table 1** Effective Capacities of Demodulator Models

| SNR | Signal Description | Mean BER (x̄) | Standard Deviation (s) | Error Margin (95% Conf. Level) |
| --- | --- | --- | --- | --- |
| 10 dB | Very Low Signal | 0.052942083333333 | 0.14751842638179 | ±0.0289 (±54.61%) |
| 15 dB | Low Signal | 0.052991458333333 | 0.14994439616778 | ±0.0294 (±55.46%) |
| 25 dB | Very Good Signal | 0.038337 | 0.12895551339405 | ±0.0253 (±65.93%) |
| 40 dB | Excellent Signal | 0.04239175 | 0.13379562029043 | ±0.0262 (±61.86%) |

**Additional Table 1I**  Statistical Analysis of Combined System Performance
